# Supplementary material for: Improving Mechanical Strength and Water Barrier Properties of Pulp Molded Product by Wet-End Added Polyamide Epichlorohydrin/Cationic Starch
Source: PubMed Central journal article supplement — ACS Omega. 2022 Jun 23;7(26):22173–80. doi: 10.1021/acsomega.1c07369 (PMC9260889; doi:10.1021/acsomega.1c07369), 2022-06-23
Supplement: ao1c07369_si_001.pdf [file ao1c07369_si_001.pdf]

# Improving mechanical strength and water barrier properties of pulp molded product by wet-end added polyamide epichlorohydrin/cationic starch

Chengrong Qin <sup>1,2</sup>, Jing Li <sup>1,2</sup>, Wei Wang <sup>1,2</sup>, Wei Li <sup>1,2,\*</sup>

<sup>1</sup>College of Light Industry and Food Engineering, Guangxi University, Nanning 530004, China

<sup>2</sup>Guangxi Key Laboratory of Clean Pulp & Papermaking and Pollution Control, Nanning 530004, China

Email: [weili@gxu.edu.cn](mailto:weili@gxu.edu.cn)

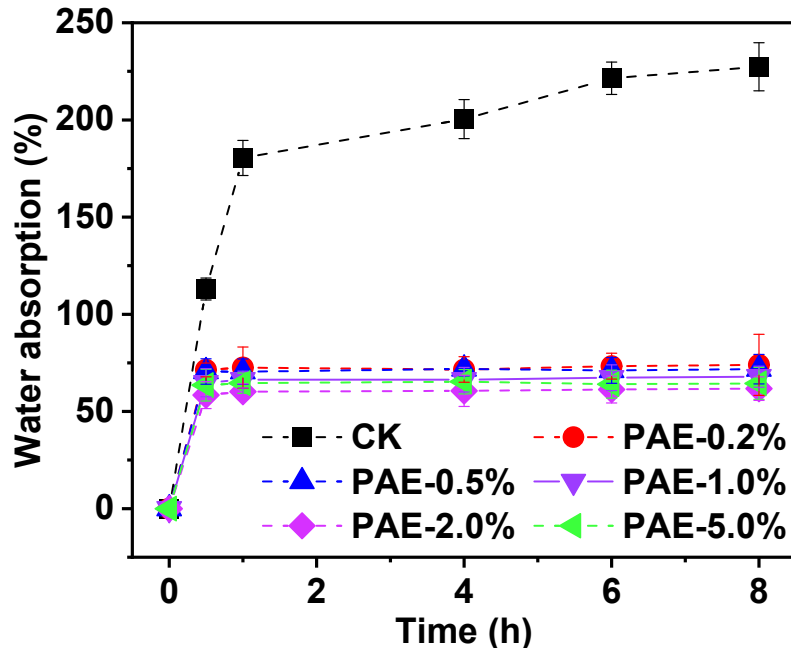

Figure S1. Water absorption of pulp molded products at different PAE dosages as a function of time.

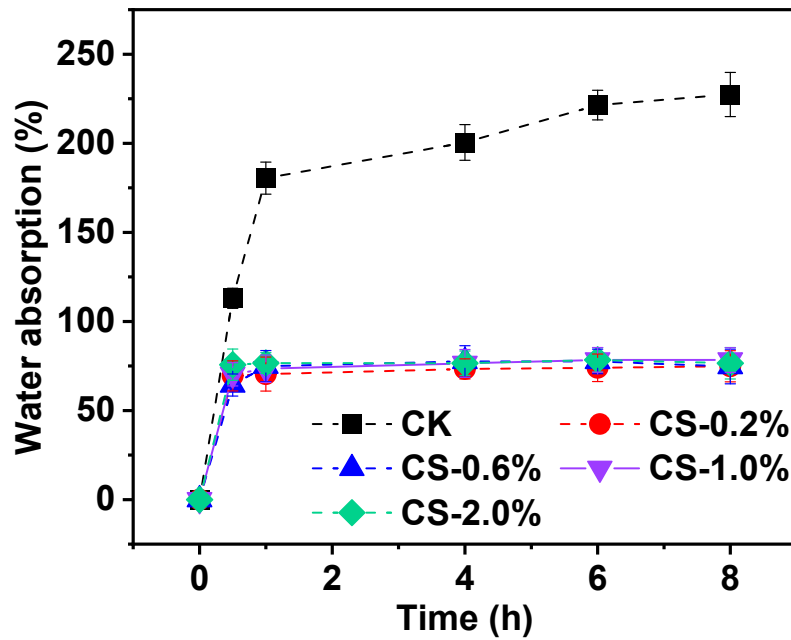

Figure S2. Water absorption of pulp molded products at different CS dosages as a function of time.

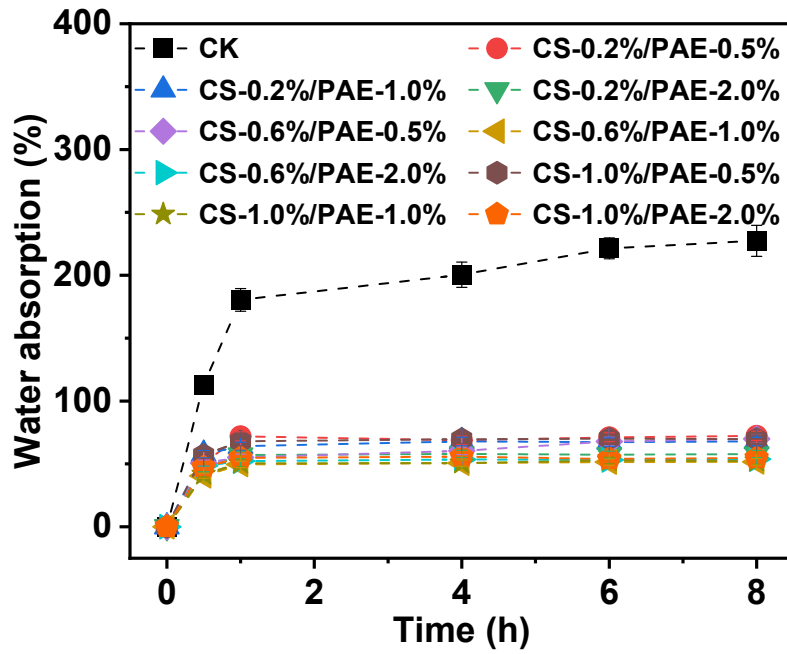

Figure S3. Water absorption of pulp molded products at various PAE and CS dosages as a function of time.

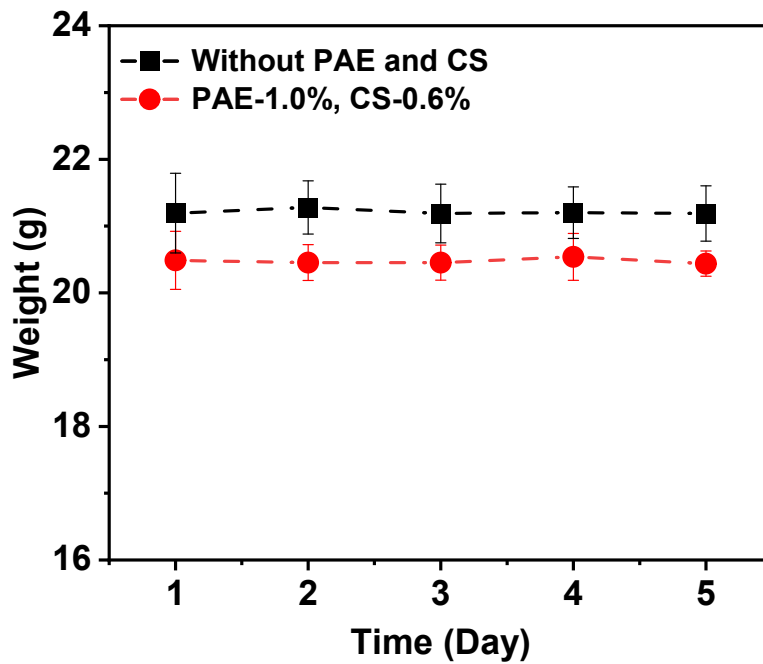

Figure S4. Weight of pulp molded products without and with PAE and CS addition at room temperature.
